# Supplementary material
Source: PubMed Central journal article supplement (PMC5960590)
Supplement: NIHMS964666-supplement-2.pdf [file NIHMS964666-supplement-2.pdf]

In the format provided by the authors and unedited.

# Sperm cells are passive cargo of the pollen tube in plant fertilization

**Jun Zhang<sup>1†</sup>, Qingpei Huang<sup>1†</sup>, Sheng Zhong<sup>1†</sup>, Andrea Bleckmann<sup>2</sup>, Jiaying Huang<sup>1</sup>, Xinyang Guo<sup>1</sup>, Qing Lin<sup>1</sup>, Hongya Gu<sup>1,3</sup>, Juan Dong<sup>4</sup>, Thomas Dresselhaus<sup>2</sup> and Li-Jia Qu<sup>1,3\*</sup>**

---

<sup>1</sup>State Key Laboratory for Protein and Plant Gene Research, Peking-Tsinghua Center for Life Sciences at College of Life Sciences, Peking University, Beijing 100871, China. <sup>2</sup>Cell Biology and Plant Biochemistry, Biochemie-Zentrum Regensburg, University of Regensburg, 93053 Regensburg, Germany. <sup>3</sup>The National Plant Gene Research Center (Beijing), Beijing 100101, China. <sup>4</sup>The Waksman Institute of Microbiology, Rutgers the State University of New Jersey, Piscataway, New Jersey 08854, USA. <sup>†</sup>These authors contributed equally to this work. \*e-mail: qulj@pku.edu.cn

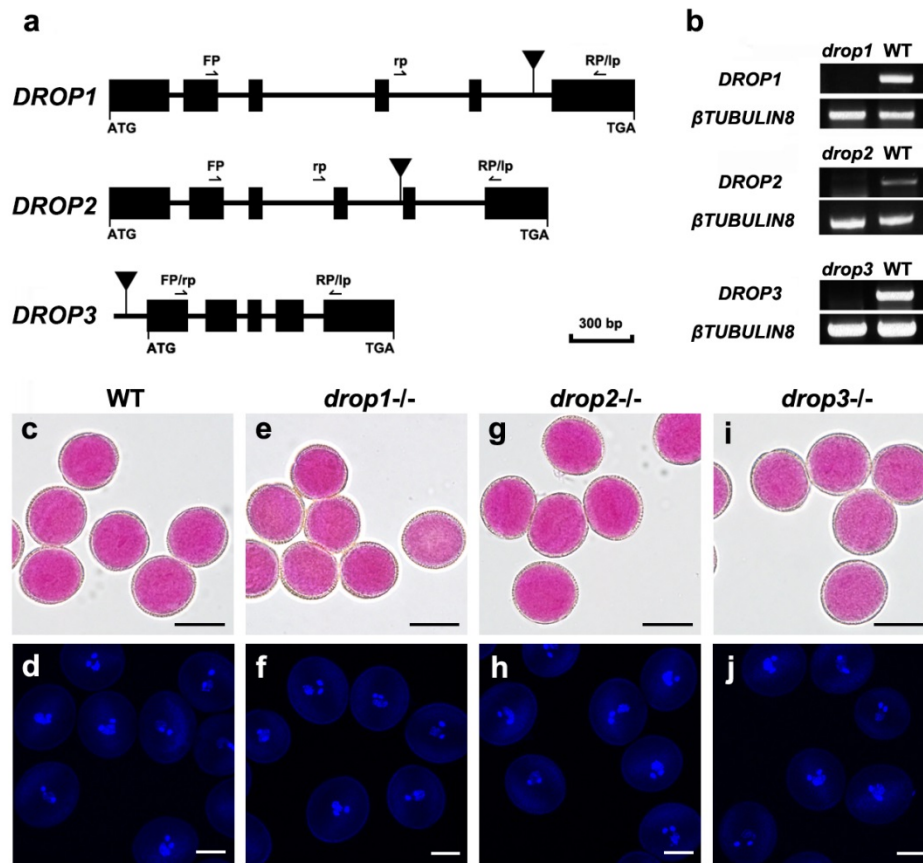

**Supplementary Fig 1 | *drop1*, *drop2* and *drop3* single mutants do not have defects in pollen development.** **a**, Schematics to show gene structure and T-DNA insertion sites in *DRO1*, *DRO2* and *DRO3* genes. Black box, exons; black line, introns; black triangle, T-DNA insertion sites. The rp/fp primers were used to amplify the insertional alleles, whereas FP/RP primers were used to confirm reverse transcription. **b**, RT-PCR to evaluate the expression level of *DRO* genes in their respective mutants. mRNAs were extracted from opening flowers and RT-PCR was performed for 35 cycles. **c-j**, Histochemical staining to evaluate mature pollen activity and development in wild-type and *drop* mutants. **c, e, g, i**, Alexander's staining for pollen viability. **d, f, h, j**, DAPI staining to visualize DNA. Scale bars, 20  $\mu$ m (**c, e, g, i**); 10  $\mu$ m (**d, f, h and j**).

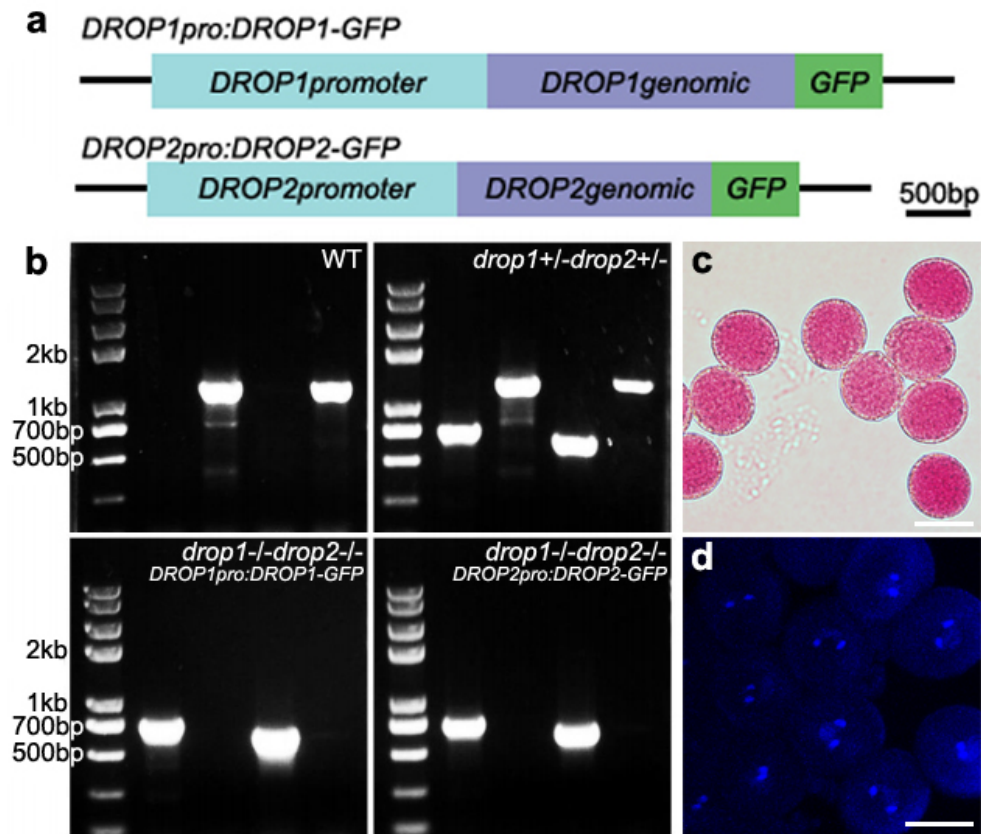

**Supplementary Fig 2** | *drop1-/- drop2-/-* double mutants can be fully rescued by *DRO1pro:DROP1-GFP* and *DRO2pro:DROP2-GFP*. **a**, Schematics of complementation constructs. **b**, Genotyping PCR to show the presence of *DRO1pro:DROP1-GFP* or *DRO2pro:DROP2-GFP* constructs in complemented *drop1-/- drop2-/-* mutant plants. *DRO1pro:DROP1-GFP* or *DRO2pro:DROP2-GFP* were transformed into *drop1+/- drop2+/-*. Multiple independent homozygous *drop1-/- drop2-/-* mutations were identified (bottom two panels) from T3 transgenic plants that were complemented by the GFP-fusion constructs. **c**, Alexander's staining of pollen from rescued *drop1-/- drop2-/-* plants. **d**, DAPI staining of pollen grains from the rescued *drop1-/- drop2-/-* plants. Scale bars, 20  $\mu$ m (**c**, **d**).

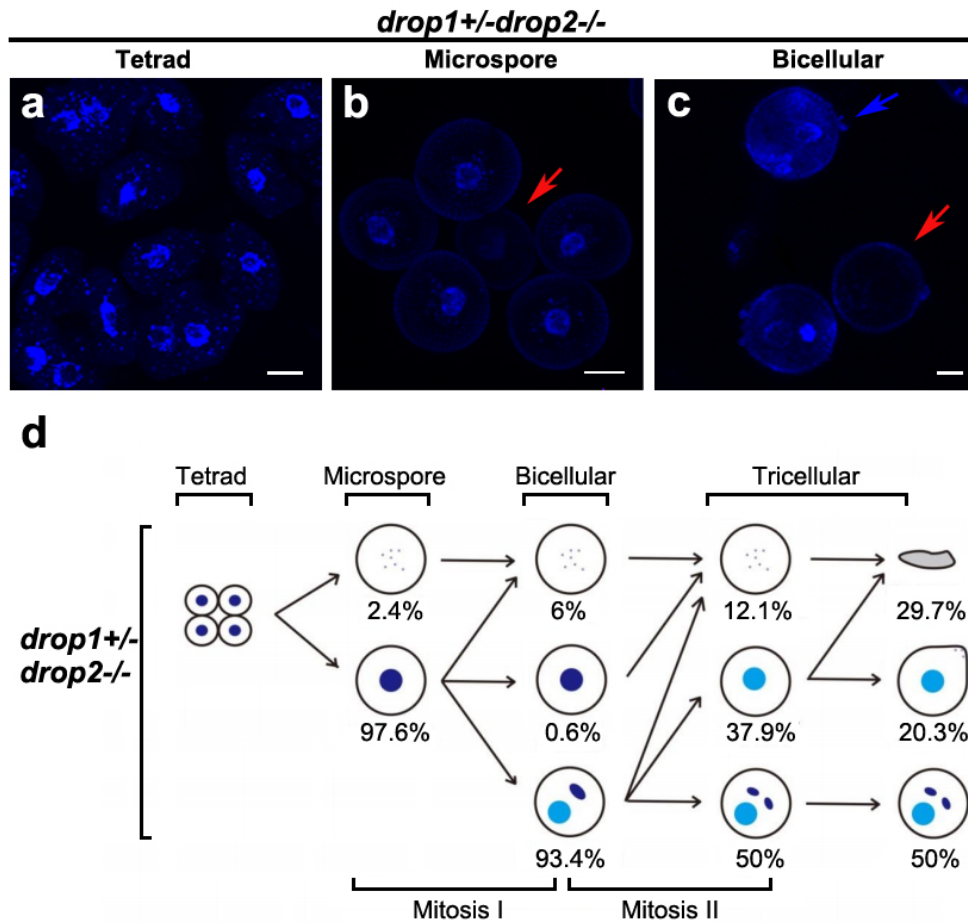

**Supplementary Fig 3 | *drop1- drop2-/-* pollen start to exhibit nuclear division defects from the microspore stage.** **a-c**, DAPI staining of *drop1+/- drop2-/-* pollen at the designated stages. Red arrow indicates abnormal pollen grains with faint nucleus-like signals, which would eventually disappear (**b**, **c**); blue arrow indicates the WT-looking pollen but contains only one nucleus. **d**, Schematic diagram and statistical analysis of developmental defects in *drop1+/- drop2-/-* mutants. Scale bars, 10  $\mu$ m (**a-c**).

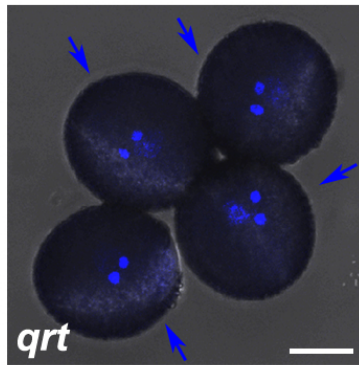

**Supplementary Fig 4 | Mature pollen grains of the *qrt1* mutant.** This picture is merged from a bright-field and a DAPI-staining UV image. Blue arrows indicate tri-cellular pollen grains. Scale bars, 10  $\mu\text{m}$ .

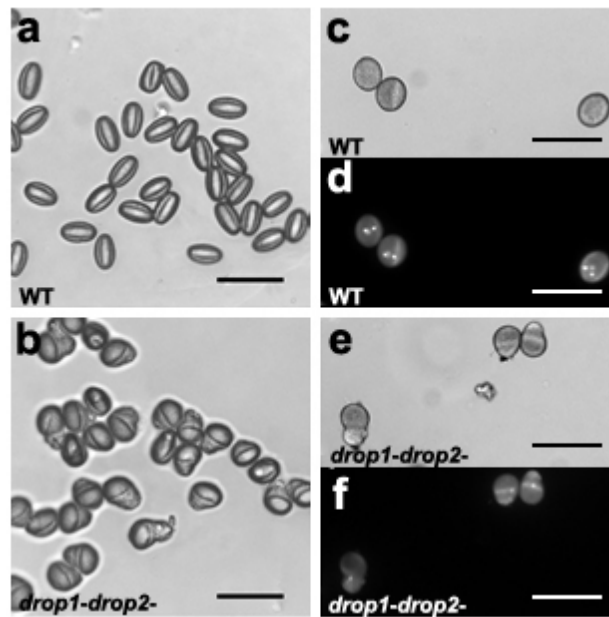

**Supplementary Fig 5 | DAPI-staining of manually-picked *drop1-drop2*- pollen grains. a, b,** Manually-picked wild-type (a) and *drop1-drop2*- pollen grains (b). **c, e,** Bright field images of manually picked wild-type (c) and *drop1-drop2*- pollen grains (e). **d, f,** DAPI staining of (c) and (e), respectively. Scale bars, 5  $\mu$ m.

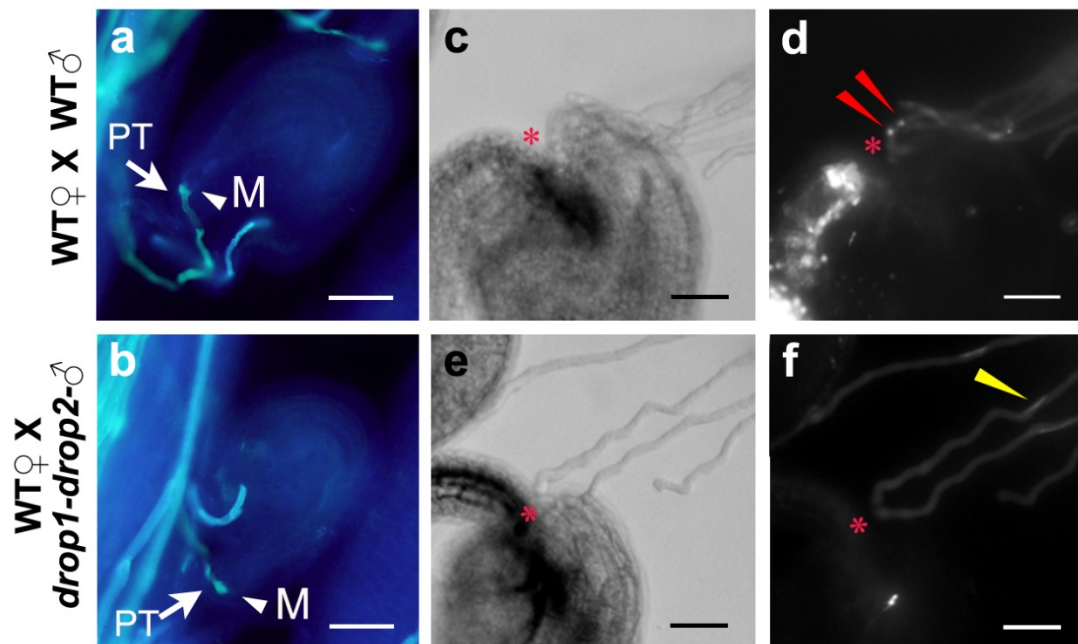

**Supplementary Fig 6 | *drop1-drop2* pollen show normal growth and guidance *in vivo* and *in vitro*.** **a-d**, Aniline blue staining to show *in vivo* pollen tube growth of wild-type (**a**) and *drop1-drop2* mutant (**d**). Wild-type and *drop1-drop2* pollen were deposited on emasculated wild-type pistils and after 12 hours, the pistils were stained to visualize tube growth. White arrow indicates a pollen tube entering the micropyle (arrowhead). **b, e**, Bright field images show targeted growth of WT (**b**) and *drop1-drop2* (**e**) pollen tubes towards detached ovules in semi-*in vivo* pollen tube guidance assays. **c, f**, DAPI staining of plant materials used in (**b, e**), respectively, reveals the identity of sperm cells in WT pollen tubes (red arrowheads in **c**), but not in the mutants (**f**). Asterisk indicates the micropyle; yellow arrowhead indicates the vegetative nucleus. Scale bars, 20  $\mu\text{m}$  (**a-f**).

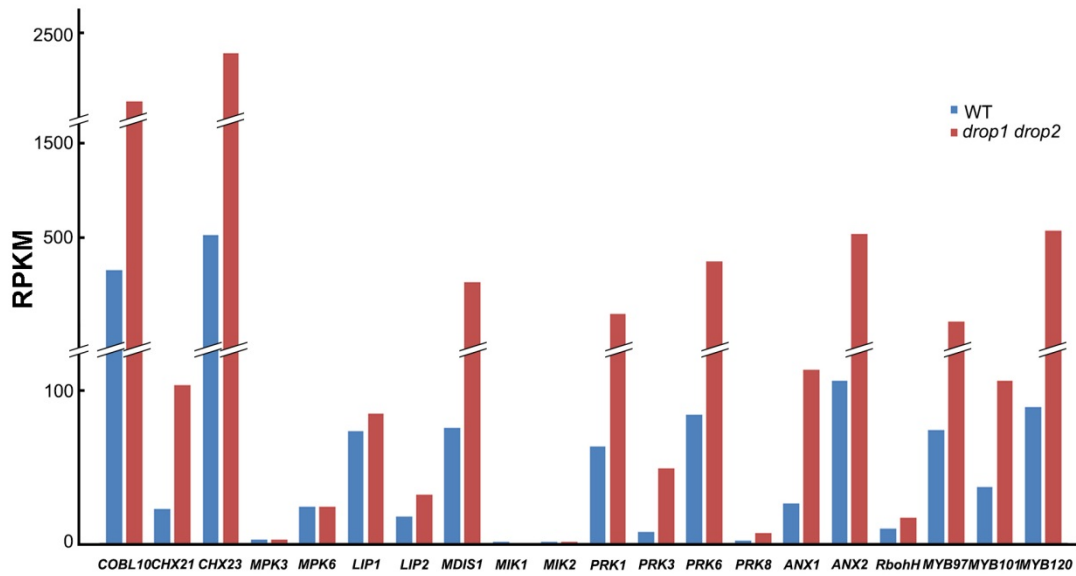

**Supplementary Fig 7 | Genes involved in pollen tube growth and guidance are up-regulated in *drop1- drop2*- semi-*in vivo* pollen tubes.** Relative expression levels of genes in the wild-type were detected by high-throughput RNA-sequencing using semi-*in vivo* pollen tubes. Relative expression levels of genes in *drop1- drop2*- mutant were detected by single-cell RNA-sequencing in semi-*in vivo* pollen tubes. RPKM, Reads Per Kilobases per Millionreads.



Supplementary Table 1 | Genetic analysis of *drop* mutants

| a.<br>Self-fertilization (Parent)          | Progeny          |                  |                  |                  |                  |                  |       | Ratio<br>(AA:Aa:aa) | Theoretical<br>Ratio |
|--------------------------------------------|------------------|------------------|------------------|------------------|------------------|------------------|-------|---------------------|----------------------|
|                                            | <i>DROP1</i> +/+ | <i>drop1</i> +/- | <i>drop1</i> -/- | <i>DROP2</i> +/+ | <i>drop2</i> +/- | <i>drop2</i> -/- | Total |                     |                      |
| <i>drop1</i> +/-                           | 76               | 152              | 73               | 301              | -                | -                | 301   | 1:2:0.96            | 1:2:1                |
| <i>drop2</i> +/-                           | 305              | -                | -                | 76               | 155              | 74               | 305   | 1:2:03:0.97         | 1:2:1                |
| <i>drop1</i> +/- <i>drop2</i> -/-          | 186              | 178              | 0                | -                | -                | 364              | 364   | 1:0.96:0            | 1:2:1                |
| <i>drop1</i> -/- <i>drop2</i> +/-          | -                | -                | 314              | 162              | 152              | 0                | 314   | 1:0.94:0            | 1:2:1                |
| b.<br>Reciprocal cross (Parent)            | Progeny          |                  |                  |                  |                  |                  |       | TE <sup>M</sup>     | TE <sup>F</sup>      |
|                                            | <i>DROP1</i> +/+ | <i>drop1</i> +/- | <i>drop1</i> -/- | <i>DROP2</i> +/+ | <i>drop2</i> +/- | <i>drop2</i> -/- | Total |                     |                      |
| <i>drop1</i> +/- <i>drop2</i> -/- ♂ × WT ♀ | 270              | 0                | -                | -                | 270              | -                | 270   | 0%                  | NA                   |
| WT ♂ × <i>drop1</i> +/- <i>drop2</i> -/- ♀ | 80               | 76               | -                | -                | 156              | -                | 156   | NA                  | 95.0%                |
| <i>drop1</i> -/- <i>drop2</i> +/- ♂ × WT ♀ | -                | 180              | -                | 180              | 0                | -                | 180   | 0%                  | NA                   |
| WT ♂ × <i>drop1</i> -/- <i>drop2</i> +/- ♀ | -                | 196              | -                | 104              | 92               | -                | 196   | NA                  | 88.5%                |

Because of the loss of the kanamycin selection marker for the SALK mutants, we used PCR to determine the transmission efficiencies (TE). TE is calculated according to the following: TE=number of progenies with T-DNA insertion/number of progenies without T-DNA insertion X 100%. 1:1 for the reciprocal crosses is the expected value for the normal gamete transmission. TEF, female transmission efficiency; TEM, male transmission efficiency; NA, not applicable.

**Supplementary Table 2 | List of primers. Names and sequences are listed in pairs as they have been used.**

|                        |                                                         |
|------------------------|---------------------------------------------------------|
| DROP1-CDS-F            | ATGATGAACTCTTCTCTTCTAACTC                               |
| DROP1-CDS-RSC          | TCACGCTTTCGAAACGGATA                                    |
| DROP1-CDS-RNSC         | CGCTTTCGAAACGGATACGG                                    |
| DROP2-CDS-F            | CACCATGAACTCCTCGTCTCTTCT                                |
| DROP2-CDS-R SC         | TCACGGCTTGAAACGGAGGGA                                   |
| DROP2-CDS-R NSC        | TCACGGCTTGAAACGGAGGGA                                   |
| DROP1-lp               | GAAGACGACCTCTCGGTCAC                                    |
| DROP1-rp               | GGGGTAATTCTTTTACAGAG                                    |
| DROP1-lp2              | TGGCTTCGTTTACAGAACAC                                    |
| DROP2-lp               | TTGGTGCTCCGTCATCTTCG                                    |
| DROP2-rp               | AACAGATGCAGAATTGCTAACAAGG                               |
| DROP2-lp2              | CCAAAGTGACGCAAATACG                                     |
| DROP1-FP               | GGACAAACGCAAACGCAAAC                                    |
| DROP1-RP               | GAAGACGACCTCTCGGTCAC                                    |
| DROP2-FP               | AGTATCGCCGAAACGGTTACG                                   |
| DROP2-RP               | TTGGTGCTCCGTCATCTTCG                                    |
| DROP3-FP               | ACCAGTTCCATCATCCTCAG                                    |
| DROP3-RP               | GCATTGAGCCGTCCTCCTGC                                    |
| DROP1-progene-BP-F     | GGGGACAAGTTTGTACAAAAAAGCAGGCTTCAGTGAACAC<br>GCCAACACAAG |
| DROP1-progene-BP-R-NSC | GGGGACCACTTTGTACAAGAAAGCTGGGTCCGCTTTCGAA<br>ACGGATACGG  |
| DROP2-progene-BP-F     | GGGGACAAGTTTGTACAAAAAAGCAGGCTTCAGAACGCGG<br>CGGAGGAAGAA |
| DROP2-progene-BP-R-NSC | GGGGACCACTTTGTACAAGAAAGCTGGGTCCGCTTGGAA<br>ACGGAGGGAG   |

## SUPPLEMENTARY METHODS

**Total RNA isolation and RT-PCR.** Total RNAs were extracted from inflorescence tissue of 10-days-bolting plants using Plant Total RNA Isolation Kit (GeneMark, Beijing). RNA reverse-transcription, cDNA synthesis and RT-PCR were conducted according to the protocols previously described<sup>1</sup>. The primers DROP1-FP/RP and DROP2-FP/RP were used to amplify the fragment spanning the T-DNA insertion site in *drop1* and *drop2* mutants, respectively.

**Plasmid construction and plant transformation.** To generate the DROP1pro:DROP1-GFP and DROP2pro:DROP2-GFP construct, native promoters and full length genomic regions of *DROP1* and *DROP2* were amplified by primers DROP1-progene-BP-F / DROP1-progene-BP-R-NSC and DROP2-progene-BP-F / DROP2-progene-BP-R-NSC, respectively (Supplementary Table 2), using total genomic DNA from Arabidopsis as template and then cloned into the pDONR221-D (Invitrogen) vector to generate pDONR221-DROP1pro:DROP1 and pDONR221-DROP2pro:DROP2 by BP reaction. For complementation, pDONR221-DROP1pro:DROP1 and pDONR221-DROP2pro:DROP2 plasmids were cloned into a GATEWAY-compatible destination vector PK7FWG0, which was modified from PK7FWG2 (Department of Plant Systems Biology, VIB-Ghent University, Ghent, Belgium) through LR reaction (Invitrogen). Constructs were then transformed into *Agrobacterium tumefaciens* GV3101, using a freeze-thaw procedure. Arabidopsis transformation and transgenic plant screening were conducted as reported<sup>2</sup>.

**DAPI staining.** DAPI staining was performed as the protocol described previously<sup>1</sup>.

## Reference

1. Liu, J.J. et al., Targeted degradation of the cyclin-dependent kinase inhibitor ICK4/KRP6 by RING-type E3 ligases is essential for mitotic cell cycle progression during Arabidopsis gametogenesis. *Plant Cell* **20**, 1538-1554 (2008).
2. Qin, G.J. et al., An indole-3-acetic acid carboxyl methyltransferase regulates Arabidopsis leaf development. *Plant Cell* **17**, 2693-2704 (2005).
